# Supplementary material for: Comparative Volatilomic Profile of Three Finger Lime (Citrus australasica) Cultivars Based on Chemometrics Analysis of HS-SPME/GC–MS Data
Source: MDPI journal article supplement (doi:10.3390/molecules27227846), 2022-11-14
Supplement: s1 [file s1]

## **SUPPLEMENTARY MATERIALS**

# **Comparative volatilomic profile of three finger lime (*Citrus australasica*) cultivars based on chemometrics analysis of HS-SPME/GC-MS data**

Rosaria Cozzolino <sup>1</sup>, José S. Câmara <sup>2,3\*</sup>, Livia Malorni<sup>1</sup>, Giuseppe Amato <sup>1</sup>, Ciro Cannavacciuolo <sup>4</sup>, Milena Masullo<sup>4</sup> and Piacente Sonia<sup>4\*</sup>

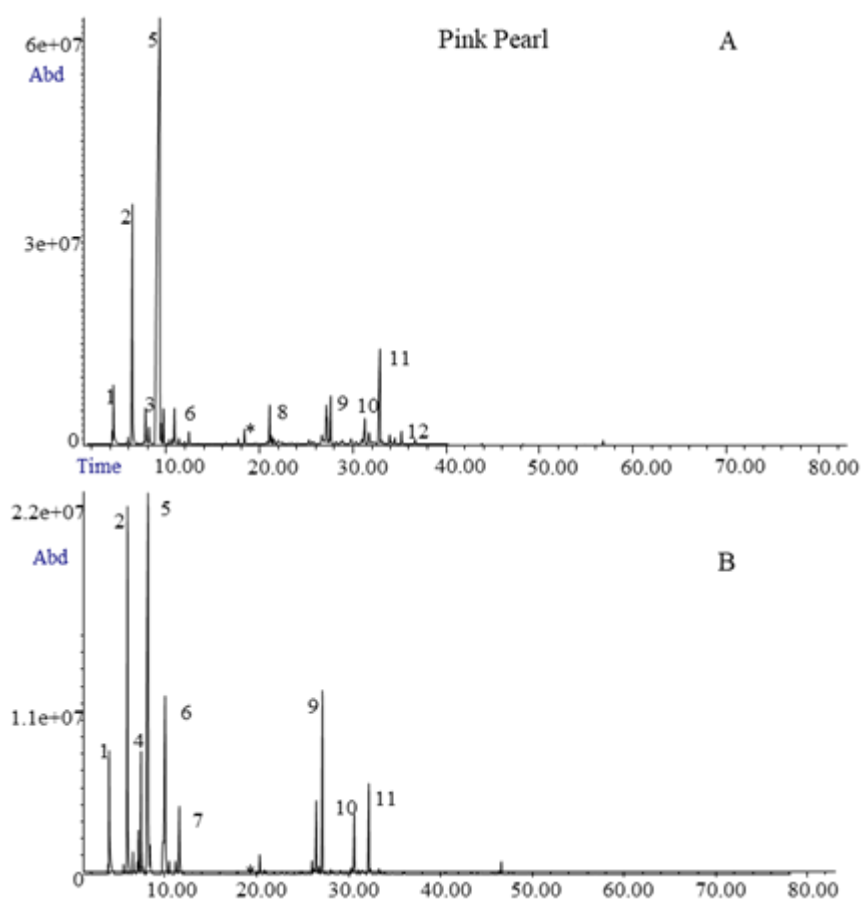

**Figure S1.** Representative TICs of the peel (A) and the juice (B) of Pink Pearl cv. (1)  $\alpha$ -Thujene, (2) Sabinene; (3)  $\beta$ -Myrcene; (4)  $\alpha$ -Terpinene; (5) Limonene; (6)  $\gamma$ -Terpinene; (7)  $\alpha$ -Terpinolene; (8)  $\delta$ -Elemene; (9) 4-Terpineol; (10) Ledene; (11) Bicyclogermacrene; (12)  $\beta$ -Citronellol; \*IS

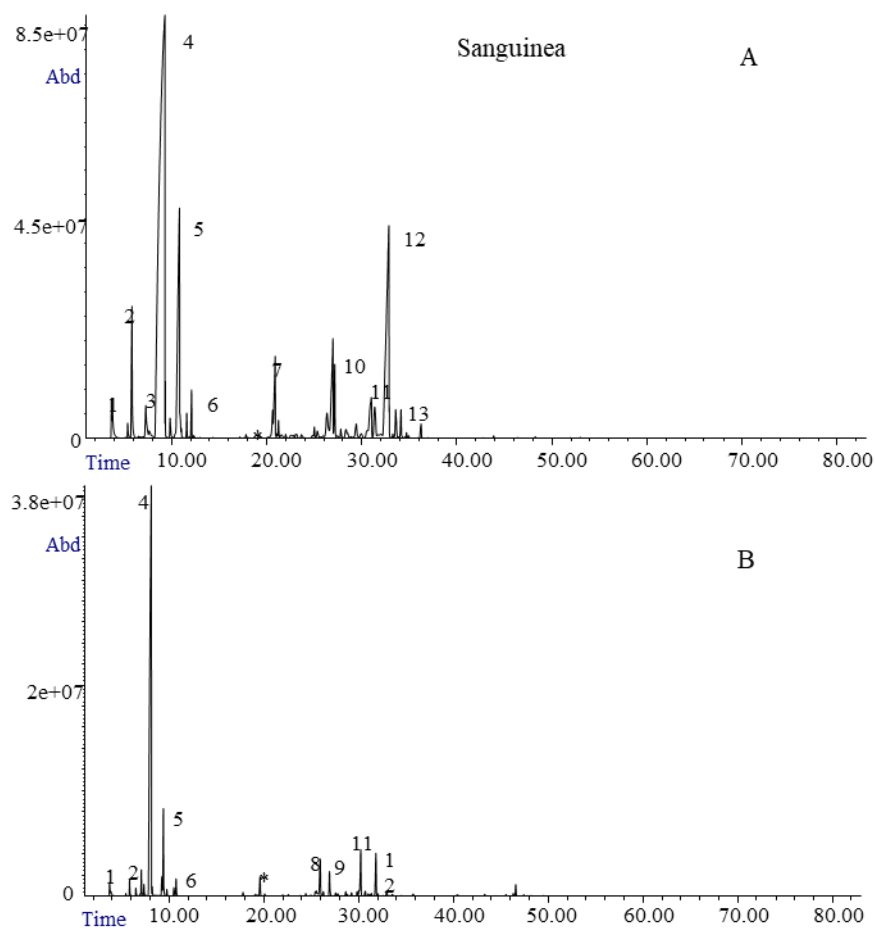

**Figure S2.** Representative TICs of the peel (A) and the juice (B) of Sanguinea cv. (1)  $\alpha$ -Pinene; (2) Sabinene; (3)  $\beta$ -Myrcene; (4) Limonene; (5)  $\gamma$ -Terpinene; (6)  $\alpha$ -Terpinolene; (7)  $\delta$ -Elemene; (8) Aromadendrene; (9) Isolatedene; (10) 4-Terpineol; (11) Ledene; (12) Bicyclogermacrene; (13)  $\alpha$ -Farnesene; \*IS

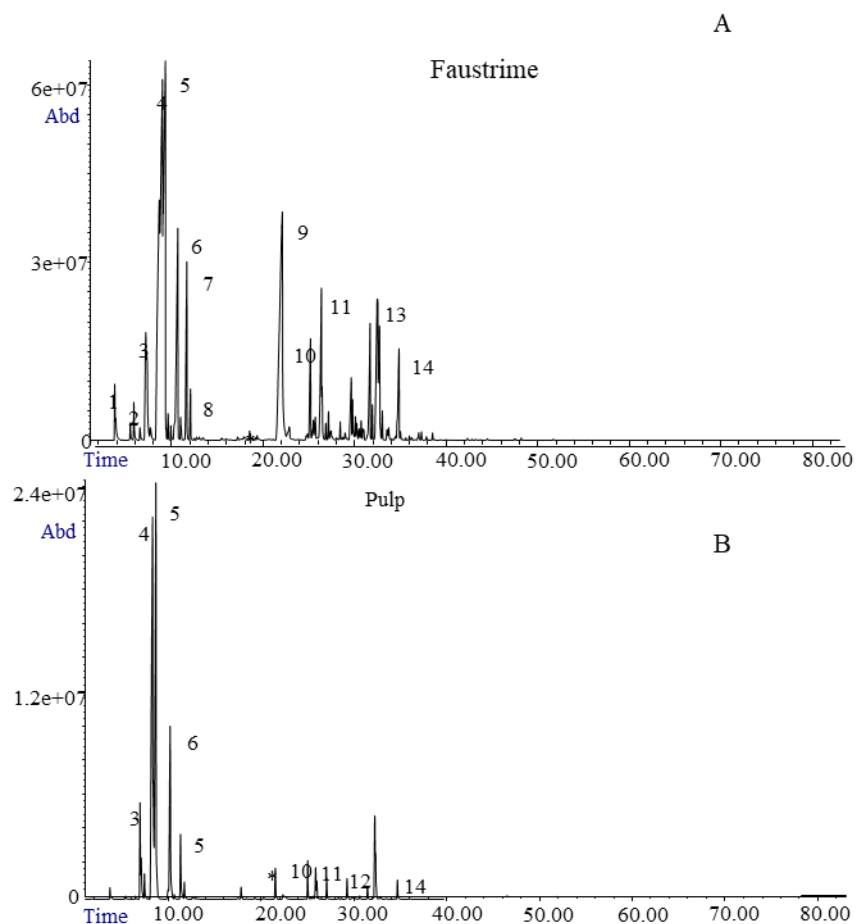

**Figure S3.** Representative TICs of the peel (A) and the juice (B) of Faustime cv. (1)  $\alpha$ -Pinene; (2) Sabinene; (3):  $\alpha$ -Phellandrene; (4) Limonene; (5)  $\beta$ -Phellandrene; (6)  $\gamma$ -Terpinene; (7) p-Cymene; (8)  $\alpha$ -Terpinolene; (9) Citronellal; (10) Linalool; (11)  $\alpha$ -Bergamotene; (12)  $\alpha$ -Caryophyllene; (13)  $\beta$ -Bisabolene; (14)  $\beta$ -Citronellol; \*IS

**Table S1.** Volatile metabolites detected in the three cv of *Citrus australasica* Mill. -and their identification codes

| Metabolite                       | Code  | <sup>a</sup> RI/ <sup>b</sup> RI | <sup>c</sup> ID | Metabolite                            | Code   | <sup>a</sup> RI/ <sup>b</sup> RI | <sup>c</sup> ID |
|----------------------------------|-------|----------------------------------|-----------------|---------------------------------------|--------|----------------------------------|-----------------|
| <b>Esters</b>                    |       |                                  |                 |                                       |        |                                  |                 |
| Ethyl acetate                    | E1    | 871/871                          | RI/MS/S         | δ-3-Carene                            | MH6    | 1135/1135                        | RI/MS/S         |
| <i>cis</i> -3-Hexen-1-ol acetate | E2    | 1323/1323                        | RI/MS           | α-Phellandrene                        | MH7    | 1160/1160                        | RI/MS           |
| Hexen-1-ol propionate            | E3    | 1387/1390                        | RI/MS           | β-Myrcene                             | MH8    | 1169/1169                        | RI/MS/S         |
| Hexyl butyrate                   | E4    | 1419/1419                        | RI/MS/S         | α-Terpinene                           | MH9    | 1184/1184                        | RI/MS/S         |
| <b>Aldehydes</b>                 |       |                                  |                 | D-Limonene                            | MH10   | 1227/1226                        | RI/MS/S         |
| 2-Butenal                        | Ald1  | 1047/1047                        | RI/MS           | β-Phellandrene                        | MH11   | 1228/1228                        | RI/MS/S         |
| Hexanal                          | Ald2  | 1084/1084                        | RI/MS/S         | <i>cis</i> -β-Ocimene                 | MH12   | 1248/1248                        | RI/MS/S         |
| <i>cis</i> -3-Hexenal            | Ald3  | 1152/1152                        | RI/MS           | γ-Terpinene                           | MH13   | 1253/1253                        | RI/MS/S         |
| 2-Hexenal                        | Ald4  | 1238/1238                        | RI/MS/S         | <i>trans</i> -β-Ocimene               | MH14   | 1261/1261                        | RI/MS/S         |
| Octanal                          | Ald5  | 1297/1297                        | RI/MS/S         | p-Cymene                              | MH15   | 1274/1274                        | RI/MS/S         |
| 2-Heptenal                       | Ald6  | 1333/1333                        | RI/MS           | α-Terpinolene                         | MH16   | 1284/1284                        | RI/MS/S         |
| Nonanal                          | Ald7  | 1398/1398                        | RI/MS/S         | Allocimene                            | MH17   | 1377/1377                        | RI/MS/S         |
| <b>Alcohols</b>                  |       |                                  |                 | <i>cis</i> -Sabinene hydrate          | MH18   | 1469/1469                        | RI/MS           |
| 2-Penten-1-ol                    | Al1   | 1332/1333                        | RI/MS           | <i>trans</i> -Sabinene hydrate        | MH19   | 1548/1546                        | RI/MS           |
| 1-Hexanol                        | Al2   | 1364/1364                        | RI/MS/S         | <b>Oxygenated Monoterpenes</b>        |        |                                  |                 |
| 3-Hexen-1-ol                     | Al3   | 1391/1392                        | RI/MS/S         | <i>cis</i> -Limonene oxide            | MO1    | 1439/1430                        | RI/MS           |
| 2-Hexen-1-ol                     | Al4   | 1414/1414                        | RI/MS/S         | Citronellal                           | MO2    | 1480/1480                        | RI/MS           |
| Benzenmethanol                   | Al5   | 1846/1846                        | RI/MS/S         | Linalool                              | MO3    | 1553/1553                        | RI/MS/S         |
| <b>Monoterpenes Hydrocarbons</b> |       |                                  |                 | Isopulegol                            | MO4    | 1565/1565                        | RI/MS           |
| α-Pinene                         | MH1   | 1015/1015                        | RI/MS/S         | Terpinen-4-ol                         | MO5    | 1595/1595                        | RI/MS/S         |
| α-Thujene                        | MH2   | 1021/1021                        | RI/MS/S         | Carvone                               | MO6    | 1722/1722                        | RI/MS/S         |
| Camphene                         | MH3   | 1052/1052                        | RI/MS/S         | β-Citronellol                         | MO7    | 1770/1770                        | RI/MS/S         |
| β-Pinene                         | MH4   | 1087/1087                        | RI/MS/S         | <i>cis</i> -p-Mentha-1(7),8-dien-2-ol | MO8    | 1790/1790                        | RI/MS           |
| Sabinene                         | MH5   | 1112/1112                        | RI/MS/S         | <i>trans</i> -Carveol                 | MO9    | 1833/1836                        | RI/MS/S         |
|                                  |       |                                  |                 | <i>cis</i> -Carveol                   | MO10   | 1863/1846                        | RI/MS/S         |
|                                  |       |                                  |                 | Methyleugenol                         | MO11   | 2012/2012                        | RI/MS           |
| <b>Sesquiterpenes</b>            |       |                                  |                 |                                       |        |                                  |                 |
| α-Cubebene                       | Sesq1 | 1449/1449                        | RI/MS           | Cadina 1,4 diene                      | Sesq26 | 1765/1768                        | RI/MS           |
| α-Copaene                        | Sesq2 | 1452/1454                        | RI/MS           | γ-Muurolene                           | Sesq27 | 1735/1731                        | RI/MS           |

|                              |        |           |         |                      |        |           |         |
|------------------------------|--------|-----------|---------|----------------------|--------|-----------|---------|
| $\delta$ -Elemene            | Sesq3  | 1463/1468 | RI/MS   | Germacrene B         | Sesq28 | 1805/1805 | RI/MS   |
| Bicycloelemene               | Sesq4  | 1471/1471 | RI/MS   | Calamenene           | Sesq29 | 1811/1812 | RI/MS   |
| $\beta$ -Bourbonene          | Sesq5  | 1504/1510 | RI/MS   | $\alpha$ -Calacorene | Sesq30 | 1897/1901 | RI/MS   |
| $\alpha$ -Gurjunene          | Sesq6  | 1514/1515 | RI/MS   | Epiglobulol          | Sesq31 | 2001/2000 | RI/MS   |
| Aristolene                   | Sesq7  | 1544/1552 | RI/MS   | Nerolidol            | Sesq32 | 2045/2045 | RI/MS/S |
| $\alpha$ -Bergamotene        | Sesq8  | 1562/1542 | RI/MS   | Sphatulenol          | Sesq33 | 2114/2129 | RI/MS   |
| $\beta$ -Elemene             | Sesq9  | 1568/1593 | RI/MS   | <b>Others</b>        |        |           |         |
| Calarene                     | Sesq10 | 1571/1544 | RI/MS   | 2-Ethyl-furan        | O1     | 945/945   | RI/MS/S |
| Aromadendrene                | Sesq11 | 1620/1622 | RI/MS/S | Tridecane            | O2     | 1296/1300 | RI/MS/S |
| Epizonarene                  | Sesq12 | 1627/1672 | RI/MS   | Tetradecene          | O3     | 1426/1428 | RI/MS   |
| $\gamma$ -Gurjunene          | Sesq13 | 1634/1635 | RI/MS   | Tetradecane          | O4     | 1402/1400 | RI/MS/S |
| Epibicyclosesquiphellandrene | Sesq14 | 1643/1669 | RI/MS   | Pentadecane          | O5     | 1503/1500 | RI/MS/S |
| Valencene                    | Sesq15 | 1646/1715 | RI/MS   |                      |        |           |         |
| $\alpha$ -Caryophyllene      | Sesq16 | 1648/1663 | RI/MS/S |                      |        |           |         |
| $\beta$ -Guaiane             | Sesq17 | 1673/1671 | RI/MS   |                      |        |           |         |
| Ledene                       | Sesq18 | 1681/1679 | RI/MS   |                      |        |           |         |
| Germacrene D                 | Sesq19 | 1692/1696 | RI/MS   |                      |        |           |         |
| $\beta$ -Selinene            | Sesq20 | 1699/1698 | RI/MS   |                      |        |           |         |
| $\alpha$ -Selinene           | Sesq21 | 1704/1704 | RI/MS   |                      |        |           |         |
| Bicyclogermacrene            | Sesq22 | 1722/1736 | RI/MS   |                      |        |           |         |
| $\beta$ -Bisabolene          | Sesq23 | 1724/1723 | RI/MS   |                      |        |           |         |
| $\delta$ -Cadinene           | Sesq24 | 1742/1749 | RI/MS   |                      |        |           |         |
| $\alpha$ - Farnesene         | Sesq25 | 1745/1745 | RI/MS   |                      |        |           |         |

<sup>a</sup>Relative retention indices calculated against n-alkanes (C<sub>8</sub>-C<sub>20</sub>) on HP-Innowax column; <sup>b</sup>Relative retention indices on polar column reported in literature for polar column ([www.pherobase.com](http://www.pherobase.com), [www.flavornet.org](http://www.flavornet.org), [www.ChemSpider.com](http://www.ChemSpider.com), <https://pubchem.ncbi.nlm.nih.gov/webbook.nist.gov>); <sup>c</sup>Identification method as indicated by the following: RI — Kovats-Relative retention index on a ~~on~~ HP-Innowax column; MS — NIST and Wiley libraries spectra; S — co-injection with authentic standard compounds on the HP-Innowax column. E: esters; Al: alcohols; Ald: aldehydes; MH: monoterpene hydrocarbons; MO: oxygenate monoterpenes; Sesqu: sesquiterpenes; O: Others.
